# Supplementary material
Source: Springer Nature journal article supplement (https://www.springermedizin.de/resource/supplementary/12947_2007_142_MOESM1_ESM.pdf/9556322)

## Men

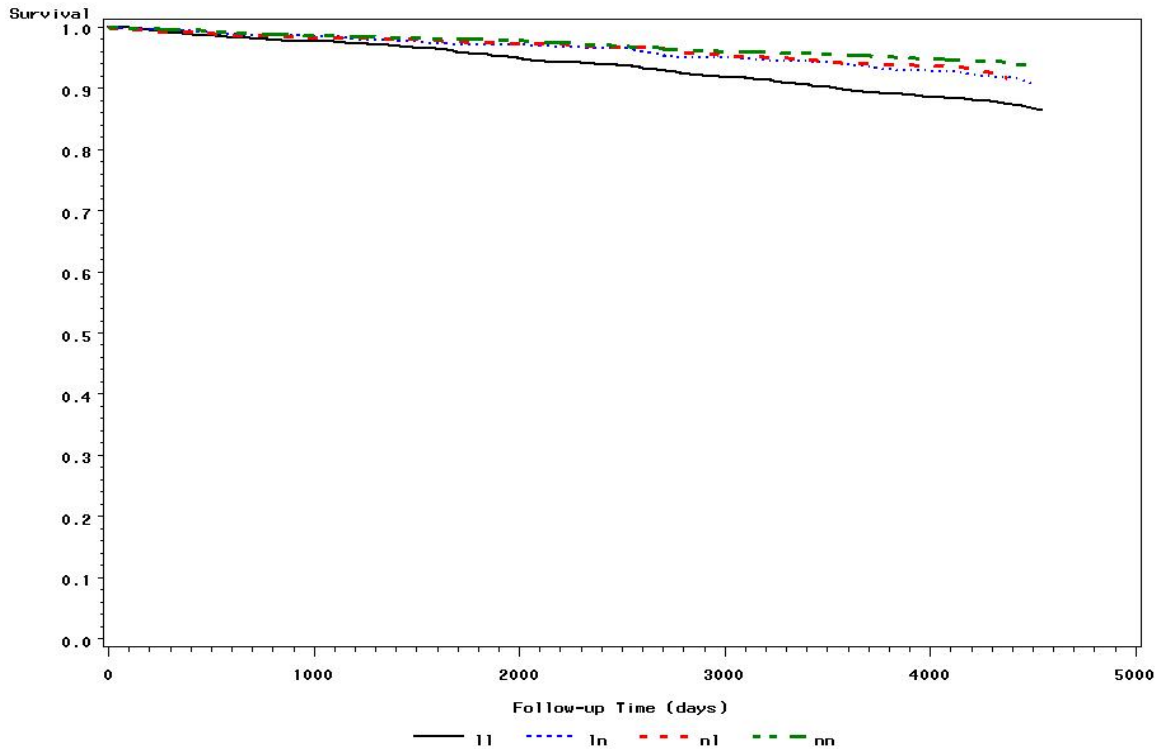

## Women

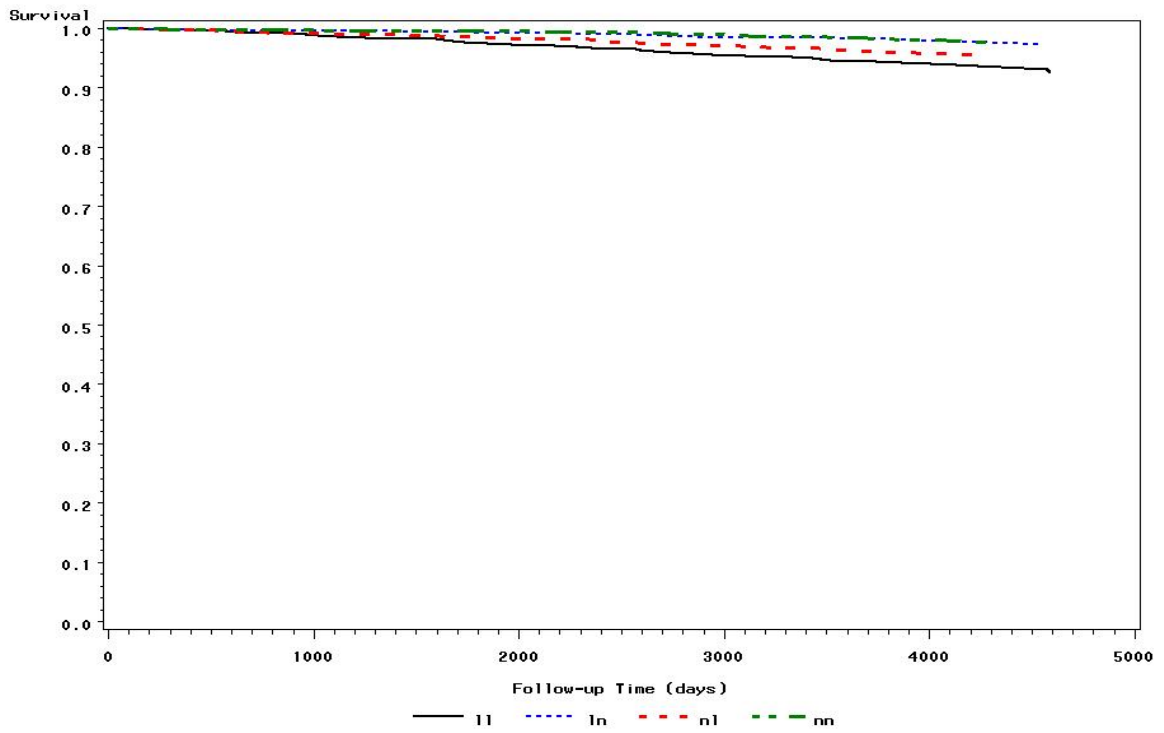

Supplement: MOESM1 [file 9556322]
